# Supplementary material for: Biotic interactions govern genetic adaptation to toxicants
Source: PubMed Central journal article supplement (PMC4426622; doi:10.1098/rspb.2015.0071), 2015-05-07
Supplement: rspb20150071supp3.pdf [file rspb20150071supp3.pdf]

## Electronic Supporting Material:

### Tables

**Table S1.** Analysis of deviance for the effects of species interactions and pesticide contamination on the larval density of *C. quinquefasciatus*. The generalised linear mixed effects model was fit by the maximum likelihood method (Laplace approximation) using a Gamma error distribution and an inverse link function. The Holm adjustment for multiple testing was applied to the contrasts of simple effects. The test cylinders were nested within the populations. The colons represent interactions. The asterisks indicate significant contrasts; \*P<0.05, \*\*\*P<0.001.

| <b>fixed effects (type II Wald <math>\chi^2</math> tests)</b> | <b><math>\chi^2</math></b> | <b>d.f.</b>     | <b>p</b> |     |
|---------------------------------------------------------------|----------------------------|-----------------|----------|-----|
| species interaction                                           | 22.39                      | 2               | < 0.001  | *** |
| contamination                                                 | 5.07                       | 1               | 0.02439  | *   |
| species interaction : contamination                           | 34.09                      | 2               | < 0.001  | *** |
| non-toxic : ref. - pred.                                      | 1.2319                     | 1               | 0.53408  |     |
| non-toxic : ref. - comp.                                      | 7.42                       | 1               | 0.01933  | *   |
| toxic : ref. - pred.                                          | 0.06                       | 1               | 0.811    |     |
| toxic : ref. - comp.                                          | 48.17                      | 1               | < 0.001  | *** |
| non-toxic - toxic : ref. - pred.                              | 30.953                     | 1               | < 0.001  | *** |
| <b>random effects</b>                                         | <b>variance</b>            | <b>std.dev.</b> |          |     |
| intercept   population                                        | < 0.01                     | < 0.01          |          |     |
| intercept   test cylinder : population                        | < 0.01                     | < 0.01          |          |     |
| residual                                                      | 0.51                       | 0.71            |          |     |

deviance = 2461.6; AIC = 2479.6; BIC = 2512.6; log-likelihood. = -1230.8; residual d.f. = 279  
observations = 288; groups = 48 (test cylinder : population), 24 (population)

**Table S2.** Analysis of deviance for the effects of pesticide contamination and species interactions on the change of the homozygous susceptible genotype frequency over time. Time was measured in generation times and log-transformed to improve the model fit. The initial genotype frequency was known and fixed at 25 %; therefore the main effects were excluded. The generalised linear mixed effects model was fit by the maximum likelihood method (Laplace approximation), using a binomial error distribution and a logit link function. The Holm adjustment for multiple testing was applied to the contrasts of simple effects. The colons represent interactions. The asterisks indicate significant contrasts; \*P<0.05, \*\*P<0.01, \*\*\*P<0.001.

| <b>fixed effects (type II Wald <math>\chi^2</math> tests)</b> | <b><math>\chi^2</math></b> | <b>d.f.</b>     | <b>p</b>    |
|---------------------------------------------------------------|----------------------------|-----------------|-------------|
| log(generation + 1) : contamination                           | 493.52                     | 2               | < 0.001 *** |
| log(generation + 1) : species interaction                     | 0.23                       | 2               | 0.891       |
| log(generation + 1) : contamination : species inter.          | 16.51                      | 2               | < 0.001 *** |
| log(generation + 1) : non-toxic : ref. - pred.                | 5.29                       | 1               | 0.043 *     |
| log(generation + 1) : non-toxic : ref. - comp.                | 1.83                       | 1               | 0.176       |
| log(generation + 1) : toxic : ref. - pred.                    | 10.27                      | 1               | 0.005 **    |
| log(generation + 1) : toxic : ref. - comp.                    | 7.51                       | 1               | 0.018 *     |
| <b>random effects</b>                                         | <b>variance</b>            | <b>std.dev.</b> |             |
| log(generation + 1)   population                              | 0.012                      | 0.108           |             |

deviance = 861.1; AIC = 875.1; BIC = 895.9; log-likelihood. = -430.5; residual d.f. = 137; observations = 144; groups = 24 (population)

**Table S3.** Analysis of deviance for the effects of sex, genotype, species interactions, pesticide contamination and time of the experiment (expressed in generations) on the wing length of adult *C. quinquefasciatus*. Wing length was measured from the first, second and sixth generations, and the generations were log-transformed to improve the model fit. The linear mixed effects model was fit by the restricted maximum likelihood method. The Holm adjustment for multiple testing was applied to the contrasts of simple effects. The colons represent interactions. The asterisks indicate significant contrasts; . < 0.1; \*P<0.05, \*\*P<0.01, \*\*\*P<0.001.

| <b>fixed effects (type II Wald <math>\chi^2</math> tests)</b>                           | <b><math>\chi^2</math></b> | <b>d.f.</b>     | <b>p</b>    |
|-----------------------------------------------------------------------------------------|----------------------------|-----------------|-------------|
| sex                                                                                     | 2277.42                    | 1               | < 0.001 *** |
| genotype                                                                                | 3.32                       | 2               | 0.190       |
| species interaction                                                                     | 13.72                      | 2               | 0.001 **    |
| contamination                                                                           | 3.40                       | 1               | 0.065 .     |
| log(generation + 1)                                                                     | 19.11                      | 1               | < 0.001 *** |
| sex : species interaction                                                               | 8.30                       | 2               | 0.016 *     |
| sex : contamination                                                                     | 0.01                       | 1               | 0.929       |
| species interaction : contamination                                                     | 1.58                       | 2               | 0.453       |
| genotype : contamination                                                                | 5.30                       | 2               | 0.071 .     |
| log(generation + 1) : genotype                                                          | 2.66                       | 2               | 0.265       |
| log(generation + 1) : contamination                                                     | 0.13                       | 1               | 0.717       |
| log(generation + 1) : species int.                                                      | 6.28                       | 2               | 0.043 *     |
| log(generation + 1) : ref.                                                              | 18.34                      | 1               | < 0.001 *** |
| log(generation + 1) : pred.                                                             | 15.67                      | 1               | < 0.001 *** |
| log(generation + 1) : comp.                                                             | 1.23                       | 1               | 0.268       |
| sex : species interaction : contamination                                               | 9.01                       | 2               | 0.011 *     |
| log(generation + 1) : genotype : contamination                                          | 20.26                      | 2               | < 0.001 *** |
| log(generation + 1) : ss - sr : non-toxic - toxic                                       | 5.06                       | 1               | 0.024 *     |
| log(generation + 1) : ss - rr : non-toxic - toxic                                       | 19.62                      | 1               | < 0.001 *** |
| log(generation + 1) : sr - rr : non-toxic - toxic                                       | 8.36                       | 1               | 0.008 **    |
| <b>random effects</b>                                                                   | <b>variance</b>            | <b>std.dev.</b> |             |
| intercept   population                                                                  | 12418.00                   | 111.44          |             |
| log(generation + 1)   population                                                        | 4767.00                    | 69.04           |             |
| residual                                                                                | 56928.00                   | 238.60          |             |
| REML criterion at convergence = 41781.11; observations = 3039; groups = 24 (population) |                            |                 |             |

**Table S4.** Life table for the calculation of the intrinsic growth rate of *Daphnia magna*. The survival and fecundity after 21 days were estimated from observations during the experiment and the colony strains.  $x$  = age of a cohort (in weeks and in generation times of *C. quinquefasciatus* = 4 weeks);  $l_x$  = probability of survival to  $x$ ;  $m_x$  = female offspring per female produced in  $x$ .

| $x$ [days] | $x$ [generations] | $l_x$ | $m_x$ | $l_x m_x$ |
|------------|-------------------|-------|-------|-----------|
| 7          |                   | 0.25  | 1.000 | 12.120    |
| 14         |                   | 0.50  | 0.890 | 5.520     |
| 21         |                   | 0.75  | 0.821 | 2.000     |

**Table S5.** Estimated model parameters and start values for the simulation of the experimental conditions. See text for details. \* Competitive strength *comp* and the degree of resource overlap, *o*, between the interspecific competitors were not directly included in the model but were used to calculate the competition coefficients *c*. \*\* The dominance of the fitness costs for a given parameter was not directly included in the model but was used to calculate *r*, *K*, and *c* for the sr genotype.

| parameter   | non-toxic conditions | toxic conditions |
|-------------|----------------------|------------------|
| $r_{ss}$    | 2.00                 | 1.92             |
| $r_{sr}$    | 1.92                 | 1.92             |
| $r_{rr}$    | 1.92                 | 1.92             |
| $r_i$       | 10.08                | 10.08            |
| $K_{ss}$    | 320.00               | 218.00           |
| $K_{sr}$    | 272.00               | 272.00           |
| $K_{rr}$    | 272.00               | 272.00           |
| $K_i$       | 831.00               | 831.00           |
| $c_{ss,sr}$ | 0.99                 | 1.14             |
| $c_{ss,rr}$ | 0.99                 | 1.14             |
| $c_{ss,i}$  | 0.30                 | 0.28             |
| $c_{sr,ss}$ | 1.01                 | 0.88             |
| $c_{sr,rr}$ | 1.00                 | 1.00             |
| $c_{sr,i}$  | 0.29                 | 0.29             |
| $c_{rr,ss}$ | 1.01                 | 0.88             |
| $c_{rr,sr}$ | 1.00                 | 1.00             |
| $c_{rr,i}$  | 0.29                 | 0.29             |
| $c_{i,ss}$  | 2.11                 | 1.48             |
| $c_{i,sr}$  | 1.98                 | 2.00             |
| $c_{i,rr}$  | 1.98                 | 2.00             |
| $a_{ss}$    | 0.67                 | 0.67             |
| $a_{sr}$    | 0.67                 | 0.67             |
| $a_{rr}$    | 0.67                 | 0.67             |
| $a_i$       | 0.00                 | 0.00             |
| $f_{ss}$    | 0.00                 | 0.00             |
| $f_{sr}$    | 0.00                 | 0.00             |
| $f_{rr}$    | 0.00                 | 0.00             |

|                             |        |        |
|-----------------------------|--------|--------|
| <i>q</i>                    | 0.00   | 0.00   |
| <hr/>                       |        |        |
| <i>comp<sub>ss</sub></i> *  | 1.00   | 0.87   |
| <i>comp<sub>sr</sub></i> *  | 0.99   | 0.99   |
| <i>comp<sub>rr</sub></i> *  | 0.99   | 0.99   |
| <i>comp<sub>i</sub></i> *   | 0.38   | 0.38   |
| <i>o<sub>ss,i</sub></i> *   | 0.80   | 0.65   |
| <i>o<sub>sr,i</sub></i> *   | 0.76   | 0.77   |
| <i>o<sub>rr,i</sub></i> *   | 0.76   | 0.77   |
| <i>dominance.r</i> **       | 1.00   | 0.00   |
| <i>dominance.K</i> **       | 1.00   | 0.00   |
| <i>dominance.o</i> **       | 1.00   | 0.00   |
| <i>dominance.comp</i> **    | 1.00   | 0.00   |
| <hr/>                       |        |        |
| <i>N.start<sub>ss</sub></i> | 50.00  | 50.00  |
| <i>N.start<sub>sr</sub></i> | 100.00 | 100.00 |
| <i>N.start<sub>rr</sub></i> | 50.00  | 50.00  |
| <i>N.start<sub>p</sub></i>  | 1.00   | 1.00   |
| <i>N.start<sub>i</sub></i>  | 200.00 | 200.00 |
| <hr/>                       |        |        |
